# Supplementary material for: Toward Precision Feeding Regarding Minerals: What Is the Current Practice in Commercial Dairy Herds in Québec, Canada?
Source: MDPI journal article supplement (doi:10.3390/ani11051320), 2021-05-05
Supplement: s1 [file s1]

# SUPPLEMENTARY FILES

Supplementary table 1. Equations for determining mineral requirements of dairy cows according to 3 different references<sup>1</sup>

| Minerals    | Requirement   | Sources                                                                                                                                                            |                                                                                               |                                                                                                                                                                    |
|-------------|---------------|--------------------------------------------------------------------------------------------------------------------------------------------------------------------|-----------------------------------------------------------------------------------------------|--------------------------------------------------------------------------------------------------------------------------------------------------------------------|
|             |               | National Research Council                                                                                                                                          | Institut National de la Recherche Agronomique                                                 | European Federation of Animal Science                                                                                                                              |
| P (g/day)   | Factorial     |                                                                                                                                                                    |                                                                                               |                                                                                                                                                                    |
|             | Maintenance   | Fecal = 1 x DMI and Urine = 0.002 x BW                                                                                                                             | Maintenance = (0.83 x DMI) + (0.002 x BW)                                                     | Maintenance = 1 x DMI                                                                                                                                              |
|             | Lactation     | Milk = 0.9 x FCM <sup>2</sup>                                                                                                                                      | Milk = 0.9 x milk yield (L)                                                                   | Milk = 0.98 x milk yield (kg)                                                                                                                                      |
|             | Pregnancy     | If PregD ≥ 190, then Fetal = 0.02743 x<br>Exp(((0.05527 – (0.000075 x PregD)) x<br>PregD)) – 0.02743 x Exp(((0.05527 –<br>(0.000075 x (PregD – 1))) x (PregD -1))) | If PregD ≥ 190, then Fetal = 7.38/(1 +<br>Exp(1.9 – 5.46 x ln(40 – Weeks before<br>calving))) | If PregD ≥ 190, then Fetal = 0.02743 x<br>Exp(((0.05527 – (0.000075 x PregD)) x<br>PregD)) – 0.02743 x Exp(((0.05527 –<br>(0.000075 x (PregD – 1))) x (PregD -1))) |
|             | Growth        | Growth = (1.2 + (4.635 x (MW <sup>0.22</sup> ) x (BW <sup>-0.22</sup> ))) x (WG/0.96)                                                                              | Growth = (1.2 + (4.66 x (MW <sup>0.22</sup> ) x (BW <sup>-0.22</sup> ))) x WG                 | Growth = (1.2 + (4.635 x (MW <sup>0.22</sup> ) x (BW <sup>-0.22</sup> ))) x (WG/1000)                                                                              |
| Co (mg/day) | Non-factorial | 0.11 x DMI                                                                                                                                                         | 0.3 x DMI                                                                                     | 0.1 x DMI                                                                                                                                                          |
| Cu (mg/day) | Non-factorial | -                                                                                                                                                                  | 10 x DMI                                                                                      | 10 x DMI                                                                                                                                                           |
|             | Factorial     |                                                                                                                                                                    |                                                                                               |                                                                                                                                                                    |
|             | Maintenance   | Fecal = 0.0071 x BW                                                                                                                                                | -                                                                                             | -                                                                                                                                                                  |
|             | Lactation     | Milk = 0.15 x FCM                                                                                                                                                  | -                                                                                             | -                                                                                                                                                                  |
|             | Pregnancy     | If PregD < 100, then Fetal = 0.5<br>If 100 ≤ PregD ≤ 225, then Fetal = 1.5<br>If PregD > 225, then Fetal = 2                                                       | -                                                                                             | -                                                                                                                                                                  |
|             | Growth        | Growth = 1.15 x (WG/0.96)                                                                                                                                          | -                                                                                             | -                                                                                                                                                                  |
| Fe (mg/day) | Non-factorial | -                                                                                                                                                                  | -                                                                                             | 50 x DMI                                                                                                                                                           |

|             |               |                                           |          |          |
|-------------|---------------|-------------------------------------------|----------|----------|
| Mn (mg/day) | Factorial     |                                           |          |          |
|             | Maintenance   | 0                                         | -        |          |
|             | Lactation     | Milk = 1 x FCM                            | -        |          |
|             | Pregnancy     | If PregD > 190, then Fetal = 18           | -        |          |
|             | Growth        | Growth = 34 x (WG/0.96)                   | -        |          |
|             | Non-factorial | -                                         | 50 x DMI | 40 x DMI |
|             | Factorial     |                                           |          |          |
|             | Maintenance   | Fetal = 0.002 x BW                        | -        | -        |
|             | Lactation     | Milk = 0.03 x FCM                         | -        | -        |
|             | Pregnancy     | If PregD > 190, then Fetal = 0.3          | -        | -        |
| Zn (mg/day) | Growth        | Growth = 0.7 x (WG/0.96)                  | -        | -        |
|             | Non-factorial | -                                         | 50 x DMI | 50 x DMI |
|             | Factorial     |                                           |          |          |
|             | Maintenance   | Fecal = 0.033 x BW and Urine = 0.012 x BW | -        | -        |
|             | Lactation     | Milk = 4 x FCM                            | -        | -        |
|             | Pregnancy     | If PregD > 190, then Fetal = 12           | -        | -        |
|             | Growth        | Growth = 24 x (WG/0.96)                   | -        | -        |
|             |               |                                           |          |          |

Abbreviations: BW = body weight; DMI = dry matter intake; FCM = fat corrected milk; MW = mature weight; PregD = days of pregnancy; WG = weight gain

<sup>1</sup> P requirements for all references are based on absorbed P and absorption coefficients should be applied to get the dietary requirements. Cu, Mn, and Zn from the National Research Council are also based on absorbed minerals. Absorption coefficients of 0.04, 0.1, 0.0075, and 0.15, for Cu, Fe, Mn and Zn were used. Regarding P, absorption coefficients of 0.64 for concentrate ingredients and 0.7 for forage were used for National

Research Council and Institut National de la Recherche Agronomique recommendations, whereas a coefficient of 0.7 was used for European Federation of Animal Science recommendations.

$$^2 \text{ Fat corrected milk} = (0.4 \times \text{milk yield}) + (15 \times (\text{milk fat concentration} / 100) \times \text{milk yield})$$
